# Supplementary material for: Efficacy and Safety of Tralokinumab in Adolescents With Moderate to Severe Atopic Dermatitis: The Phase 3 ECZTRA 6 Randomized Clinical Trial
Source: PubMed Central journal article supplement — JAMA Dermatol. 2023 Apr 19;159(6):596–605. doi: 10.1001/jamadermatol.2023.0627 (PMC10116386; doi:10.1001/jamadermatol.2023.0627), 2023-04-19
Supplement: jamadermatol-e230627-s004.pdf [file jamadermatol-e230627-s004.pdf]

## Data Sharing Statement

Paller. Efficacy and Safety of Tralokinumab in Adolescents With Moderate to Severe Atopic Dermatitis. *JAMA Dermatol*. Published April 19, 2023. doi:10.1001/jamadermatol.2023.0627

### Data

**Data available:** Yes

**Data types:** Deidentified participant data

**How to access data:** Requests for data can be made through the following URL:

<https://www.leopharmatrials.com/en/for-professionals>. Further information on LEO's data sharing policy can be found here: <https://www.leopharmatrials.com/en/our-commitment-to-transparency/access-to-anonymised-data>

**When available:** With publication

### Supporting Documents

**Document types:** None

### Additional Information

**Who can access the data:** Data-sharing is subject to approved scientifically sound research proposal and signed data-sharing agreement.

**Types of analyses:** <https://www.leopharmatrials.com/en/for-professionals>

**Mechanisms of data availability:** <https://www.leopharmatrials.com/en/for-professionals>
